# Supplementary material for: Facile and scaleable transformation of Cu nanoparticles into high aspect ratio Cu oxide nanowires in methanol
Source: Royal Society of Chemistry journal article supplement (doi:10.1039/d2ra00510g), 2022-01-01
Supplement: d2ra00510g1.pdf [file d2ra00510g1.pdf]

## Supporting Information

### Facile and scale-up transformation of Cu nanoparticles into high aspect ratio Cu oxide nanowires in methanol

Minkyu Kang,<sup>a†</sup> Minjun Bae,<sup>a†</sup> Sumin Park,<sup>a</sup> Hwichan Hong,<sup>a</sup> Taehyun Yoo,<sup>a</sup> Yonghwan Kim,<sup>a</sup>  
Myeongseok Jang,<sup>a</sup> Young-Seok Kim,<sup>\*b</sup> Yuanzhe Piao<sup>\*a,c</sup>

<sup>a</sup> Department of Applied Bioengineering, Graduate School of Convergence Science and Technology, Seoul National University, 16229 Suwon-si, Gyeonggi-do, Republic of Korea.

<sup>b</sup> Korea Electronics Technology Institute (KETI), 13509 Seongnam-si, Gyeonggi-do, Republic of Korea

<sup>c</sup> Advanced Institutes of Convergence Technology, Seoul National University, 16229 Suwon-si, Gyeonggi-do, Republic of Korea

†These authors contributed equally to this work.

**\*Corresponding author:**

Prof. Yuanzhe Piao: E-mail : parkat9@snu.ac.kr

Dr. Young-Seok Kim: E-mail : vis4freedom@keti.re.kr

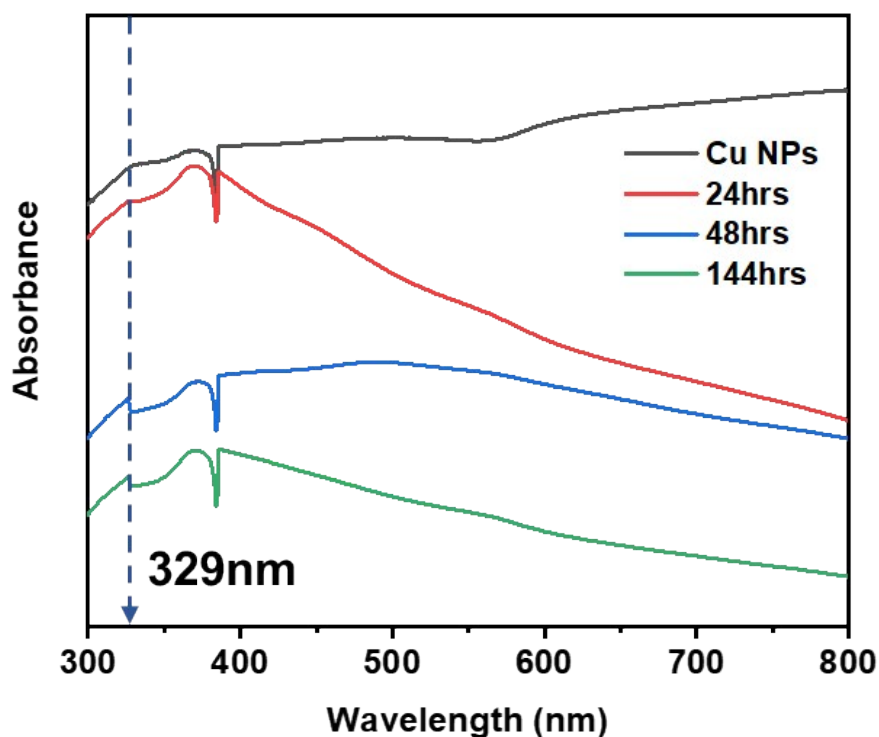

Fig. S1 Aging time effect on UV-visible absorption of Cu nanoparticles in methanol.

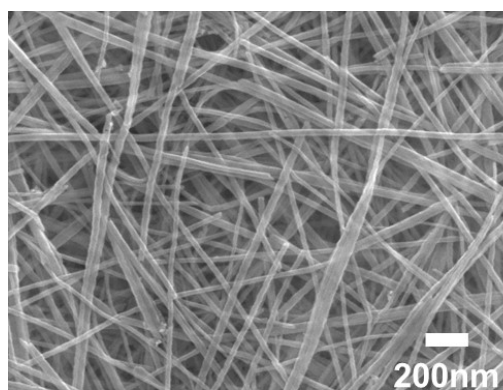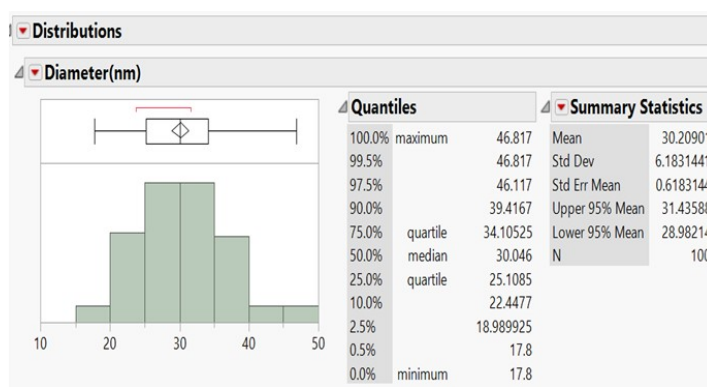

Fig. S2 The statistical information for describing the diameter of nanowires.
